# Supplementary material for: A novel pyridinium modified tetraphenylethene: AIE-activity, mechanochromism, DNA detection and mitochondrial imaging
Source: Royal Society of Chemistry journal article supplement (doi:10.1039/c7tb03012f), 2018-01-01
Supplement: c7tb03012f1.pdf [file c7tb03012f1.pdf]

**Electronic Supplementary Information**

**for**

**A Novel Pyridinium Modified Tetraphenylethene: AIE-activity,  
Mechanochromism, DNA Detection and Mitochondria Imaging**

Zhaoyang Wang,<sup>a</sup> Yuan Gu,<sup>b</sup> Junyuan Liu,<sup>a</sup> Xiao Cheng,<sup>a</sup> Jing Zhi Sun<sup>a\*</sup>, Anjun Qin<sup>c</sup> and  
Ben Zhong Tang<sup>a,b,c\*</sup>

<sup>a</sup> MOE Key Laboratory of Macromolecular Synthesis and Functionalization,  
Department of Polymer Science and Engineering, Zhejiang University, Hangzhou  
310027, China

<sup>b</sup> Department of Chemistry, Hong Kong Branch of Chinese National Engineering  
Research Center for Tissue Restoration and Reconstruction, Institute of Molecular  
Functional Materials, Institute for Advanced Study, State Key Laboratory of  
Neuroscience, Division of Biomedical Engineering and Division of Life Science, The  
Hong Kong University of Science and Technology, Clear Water Bay, Kowloon, Hong  
Kong 999077, China

<sup>c</sup> Guangdong Innovative Research Team, SCUT-HKUST Joint Research Laboratory,  
State Key Laboratory of Luminescent Materials and Devices, South China University  
of Technology, Guangzhou, Guangdong 510640, China

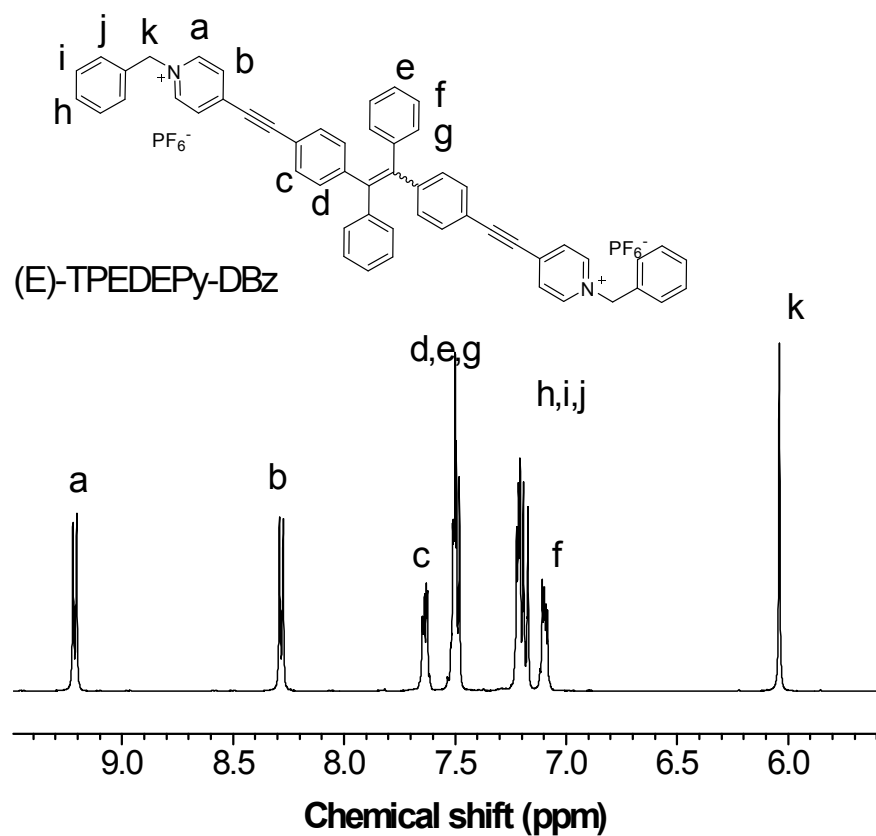

Figure S1 <sup>1</sup>H NMR spectra of (*E*)-TPEDEPy-DBz (*d*-acetone, 400 MHz)

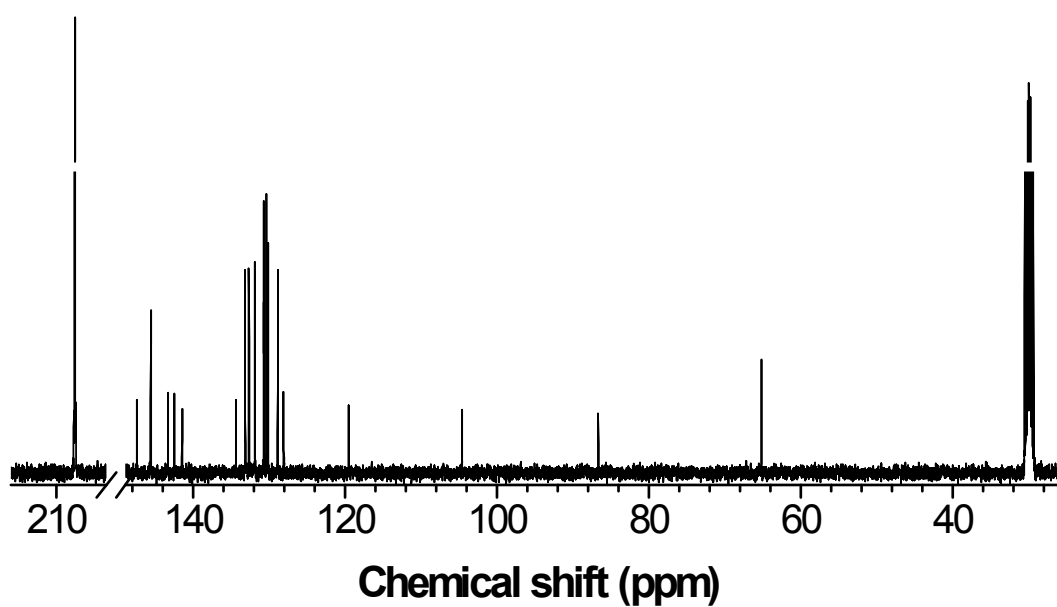

Figure S2 <sup>13</sup>C NMR spectra of (*E*)-TPEDEPy-DBz (*d*-acetone, 100MHz)

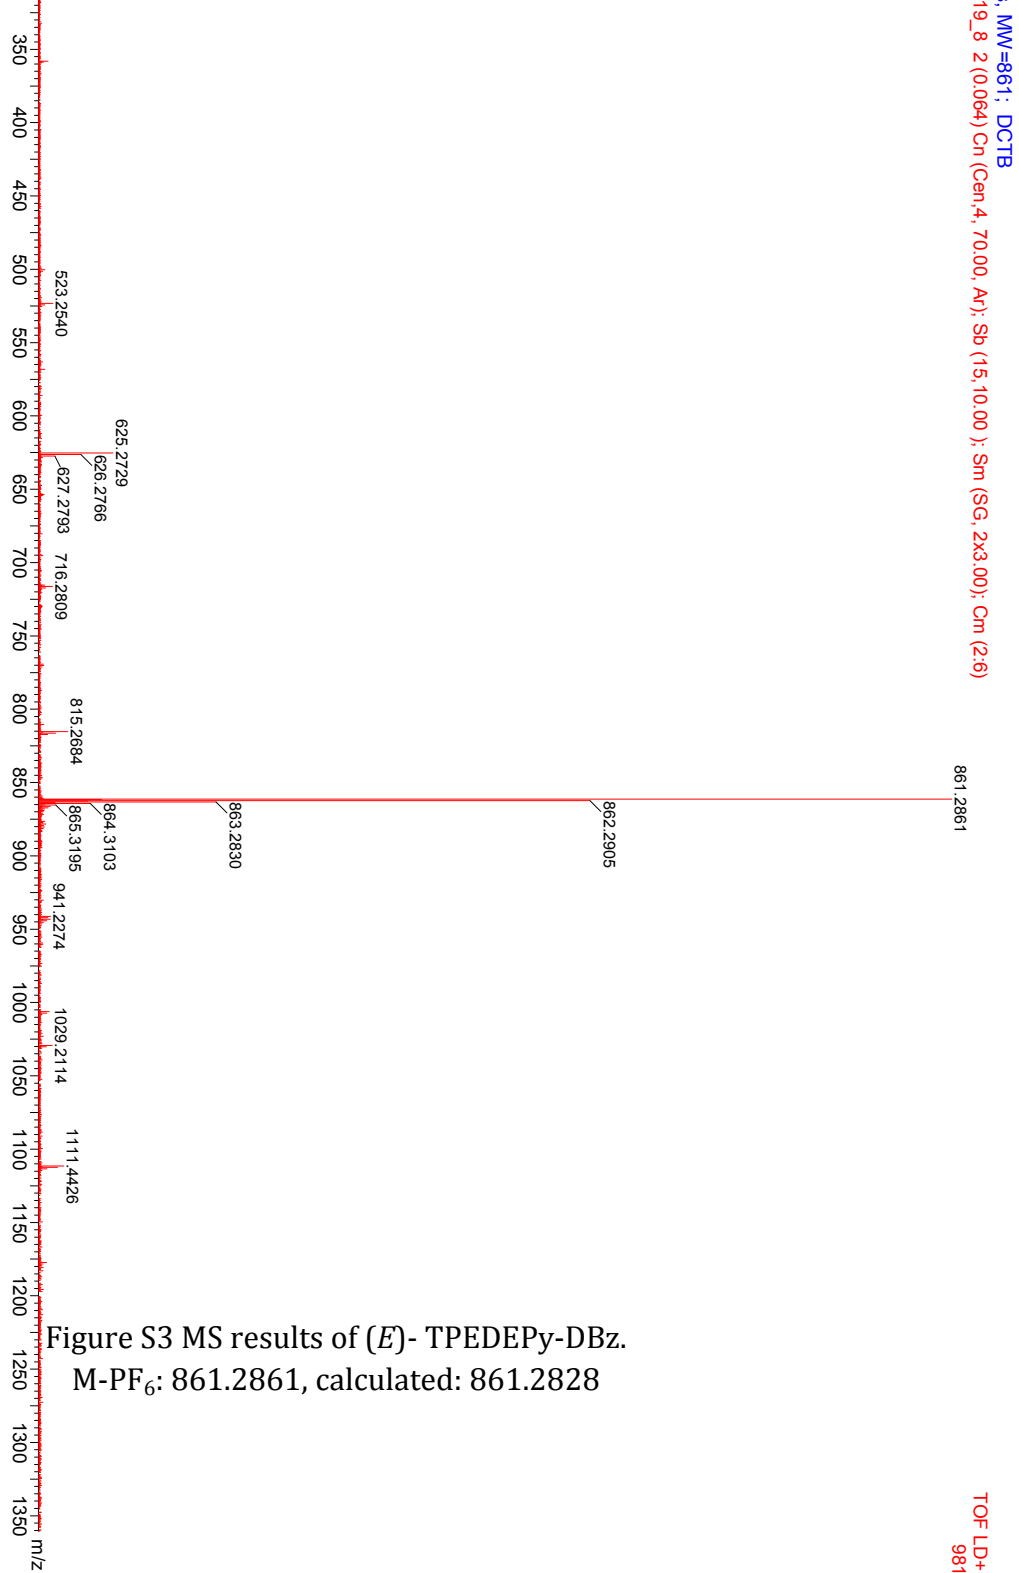

Figure S3 MS results of (*E*)- TPEDEPy-DBz.  
M-PF<sub>6</sub>: 861.2861, calculated: 861.2828

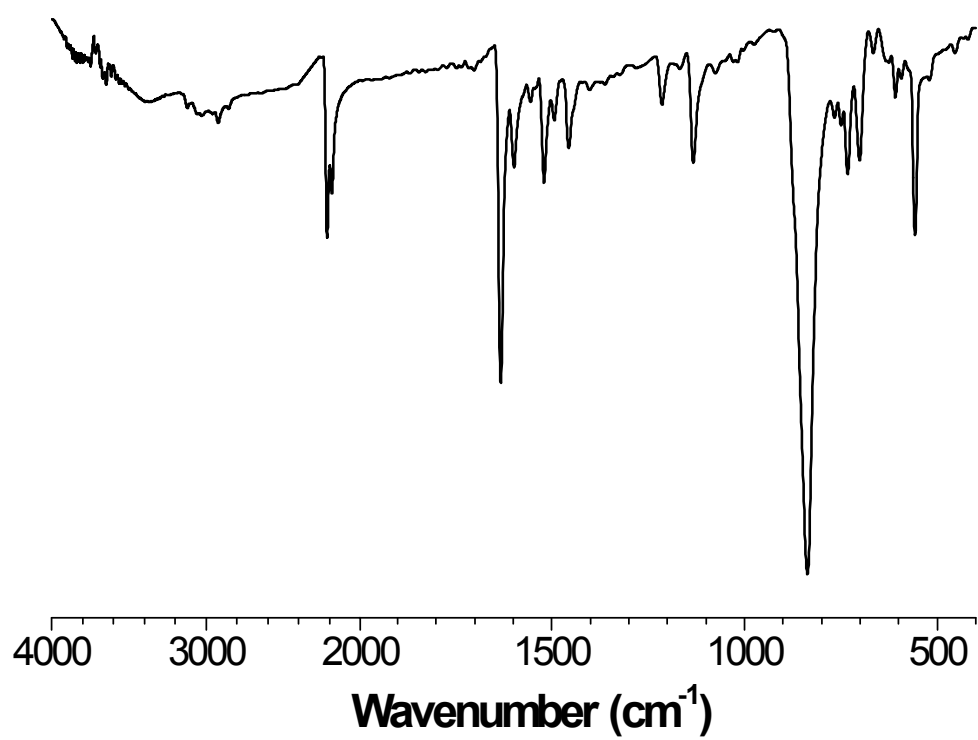

Figure S4 FT-IR spectra of (*E*)-TPEDePy-DBz in KBr pellet.

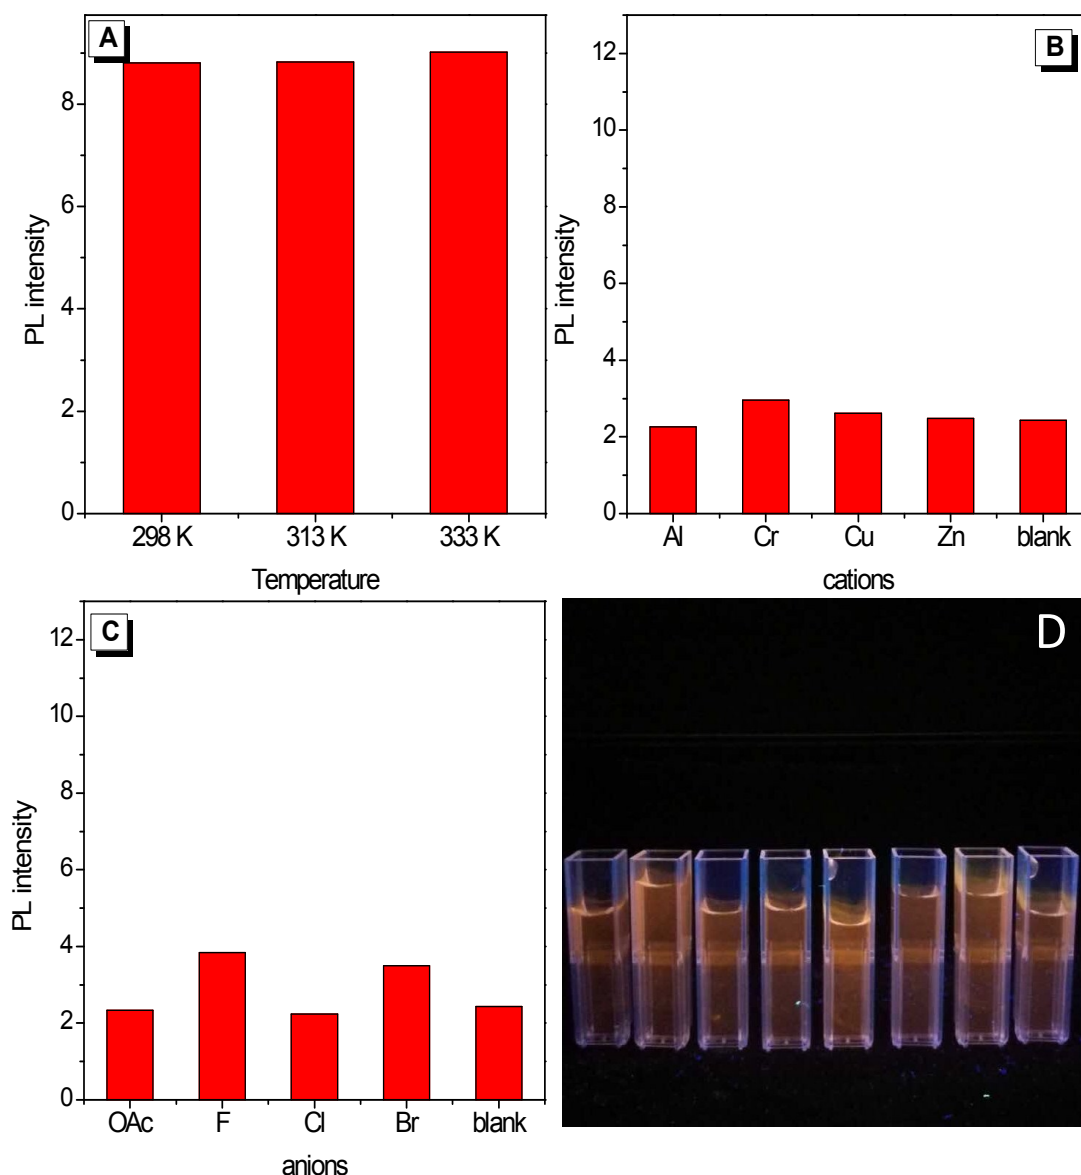

Figure S5 Photoluminescence (PL) intensity of (*E*)-TPEDEPy-2Bz ( $10^{-5}$  M, 5% DMSO in water) under different temperatures, slit: 5nm, 5nm,  $\lambda_{ex} = 395$  nm(A); with different cations( $10^{-4}$ M), slit: 3nm, 3nm,  $\lambda_{ex} = 395$  nm (B); with different anions( $10^{-4}$ M), slit: 3nm, 3nm,  $\lambda_{ex} = 395$  nm (C); Fluorescent photographs of trans-TPEDEPy-2Bz with different ions, F<sup>-</sup>, OAc<sup>2-</sup>, Br<sup>-</sup>, Cl<sup>-</sup>, Cr<sup>3+</sup>, Al<sup>3+</sup>, Zn<sup>2+</sup>, Cu<sup>2+</sup>; from left to right,  $\lambda_{ex} = 365$  nm (D). (E) PL spectra of (*E*)-TPEDEPy-2Bz ( $10^{-5}$  M, 5% DMSO in water) recorded in a one-month time gap. In this period, the sample was kept in dark at room temperature. Slit: 5 nm, 5 nm,  $\lambda_{ex} = 395$  nm.

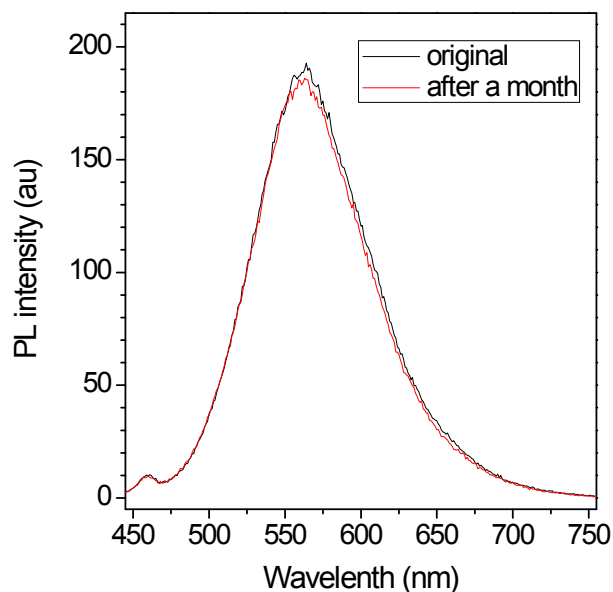

Figure S6 PL spectra of (*E*)-TPEDEPy-2Bz ( $10^{-5}$  M, 5% DMSO in water) recorded in a one-month time gap. In this period, the sample was kept in dark at room temperature. Slit: 5 nm, 5 nm,  $\lambda_{\text{ex}} = 395$  nm.

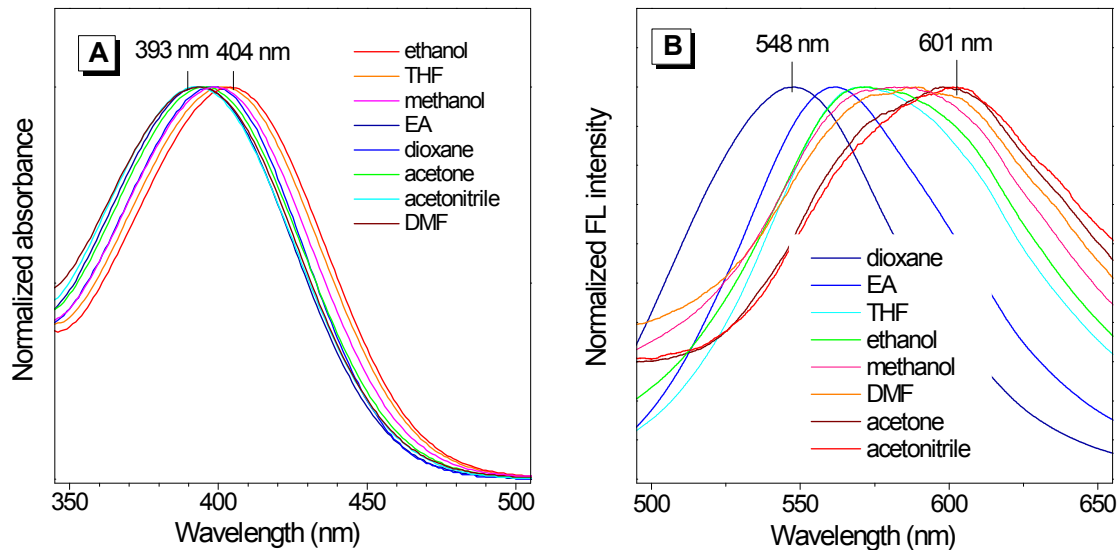

Figure S7 Normalized absorption (A) and FL (B) spectra of (*E*)-TPEDEPy-DBz in different solvents with variation of polarity. THF = tetrahydrofuran, EA = ethyl acetate and DMF = N,N-dimethylformamide,  $[M] = 10^{-5}$  mol/L;  $\lambda_{\text{ex}} = 395$  nm.

Table S1 Optical Transitions of (*E*)-TPEDEPy-DBz in different solvents including the alcohols.

| solvents | ( <i>E</i> )- TPEDEPy-DBz |                    |                    |                        |
|----------|---------------------------|--------------------|--------------------|------------------------|
|          | $\Delta f$                | $\lambda_{ab}(nm)$ | $\lambda_{em}(nm)$ | $\Delta \nu (cm^{-1})$ |
| dioxane  | 0.021                     | 398                | 548                | 6870                   |
| EA       | 0.201                     | 393                | 562                | 7645                   |
| THF      | 0.210                     | 401                | 571                | 7424                   |
| DMF      | 0.274                     | 393                | 589                | 8455                   |
| Acetone  | 0.284                     | 395                | 598                | 8599                   |
| EtOH     | 0.288                     | 404                | 572                | 7282                   |
| MeCN     | 0.306                     | 392                | 601                | 8882                   |
| MeOH     | 0.309                     | 398                | 582                | 7931                   |

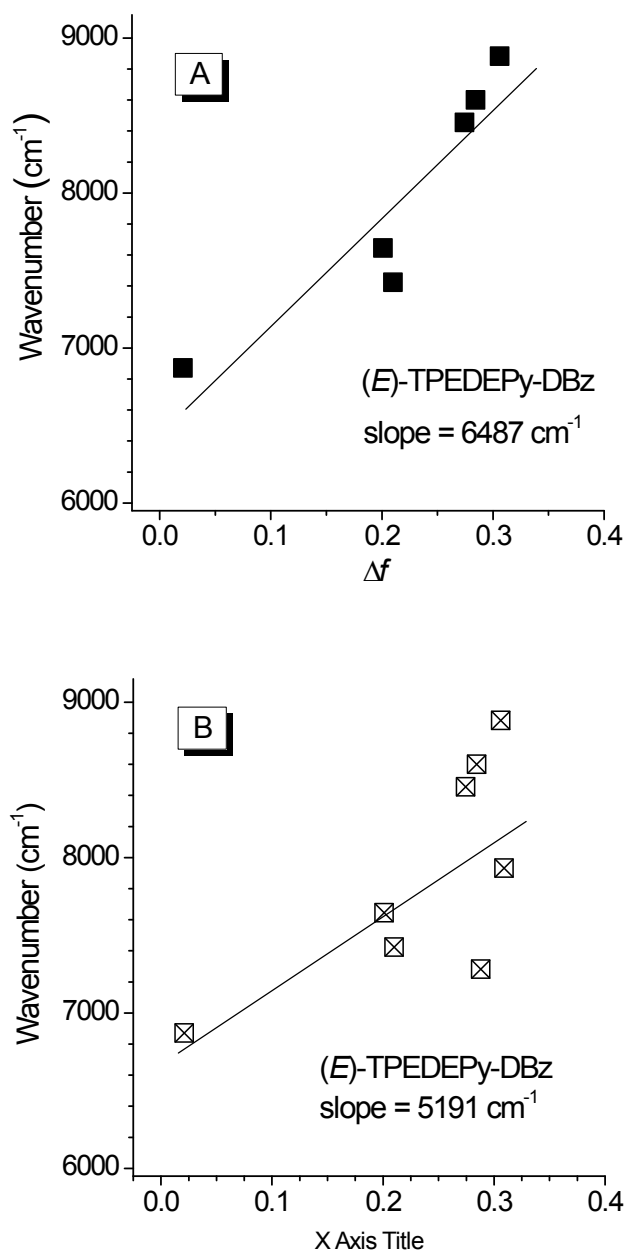

Figure S8 Plot of Stokes shift ( $\Delta \nu$ ) of  $(E)$ -TPEDEPy-DBz versus  $\Delta f$  of their solutions excluding (A) and including (B) the protic solvents.

Table S2 Calibration of DNA Concentration by UV-vis Spectroscopy

| Sample Number              | 0 | 1     | 2     | 3     | 4     | 5     | 6     | 7     | 8     | 9     | 10    | 11    | 12    |
|----------------------------|---|-------|-------|-------|-------|-------|-------|-------|-------|-------|-------|-------|-------|
| Abs(260)                   | 0 | 0.020 | 0.039 | 0.058 | 0.082 | 0.101 | 0.154 | 0.209 | 0.298 | 0.401 | 0.601 | 0.814 | 0.997 |
| [DNA]/( $\mu\text{g/mL}$ ) | 0 | 1.00  | 1.95  | 2.90  | 4.10  | 5.05  | 7.70  | 10.45 | 14.90 | 20.05 | 30.05 | 40.70 | 49.85 |

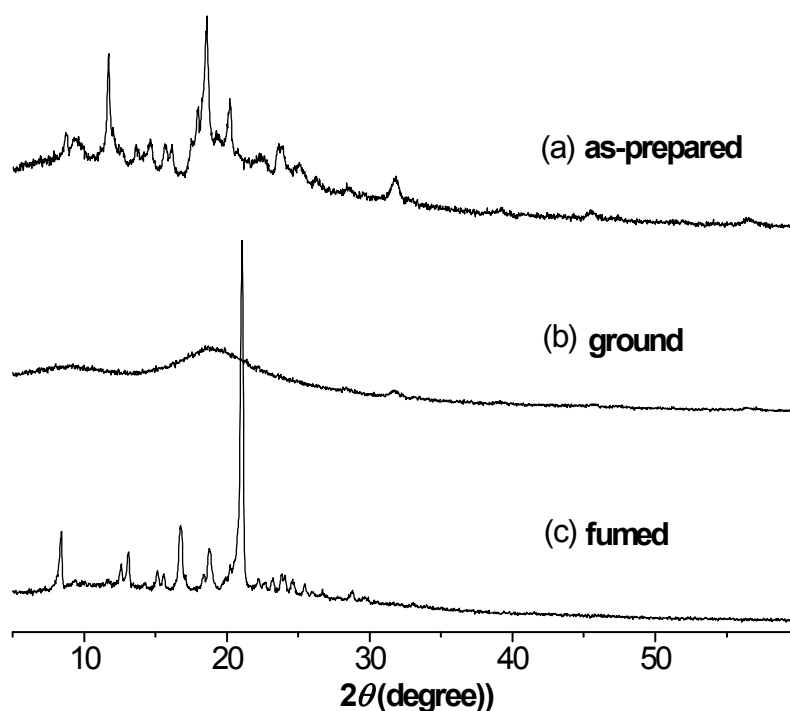

Figure S9 X-ray diffraction patterns for (*E*)-TPEDEPy-DBz solid samples in different states. (a) As-prepared solid; (b) powder sample obtained by grinding the as-prepared solid; (c) the ground powders fumed with acetone vapor for 5 minutes.

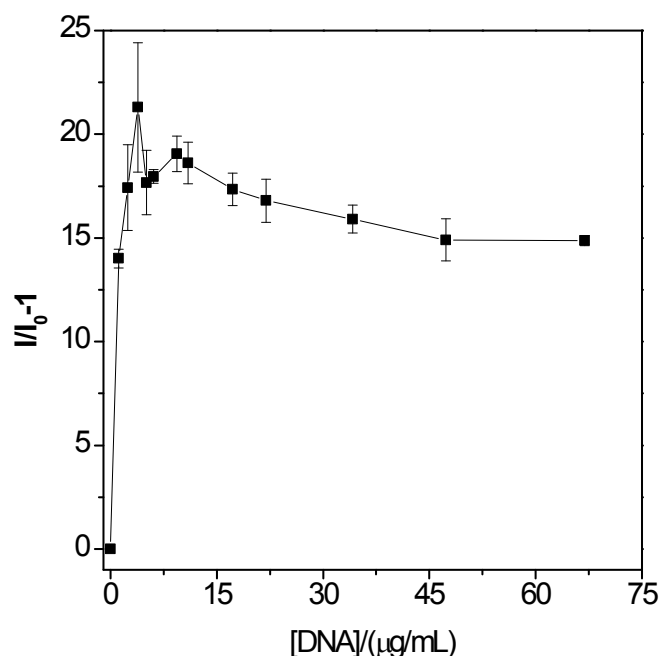

Figure S10 Variation of the relative FL intensity ( $I/I_0-1$ ) of (*E*)-TPEDEPy-DBz with the addition of different amounts of herring sperm DNA;  $I$  and  $I_0$  are fluorescence intensity of (*E*)-TPEDEPy-DBz with and without DNA in the system;  $\lambda_{\text{ex}} = 395 \text{ nm}$ .

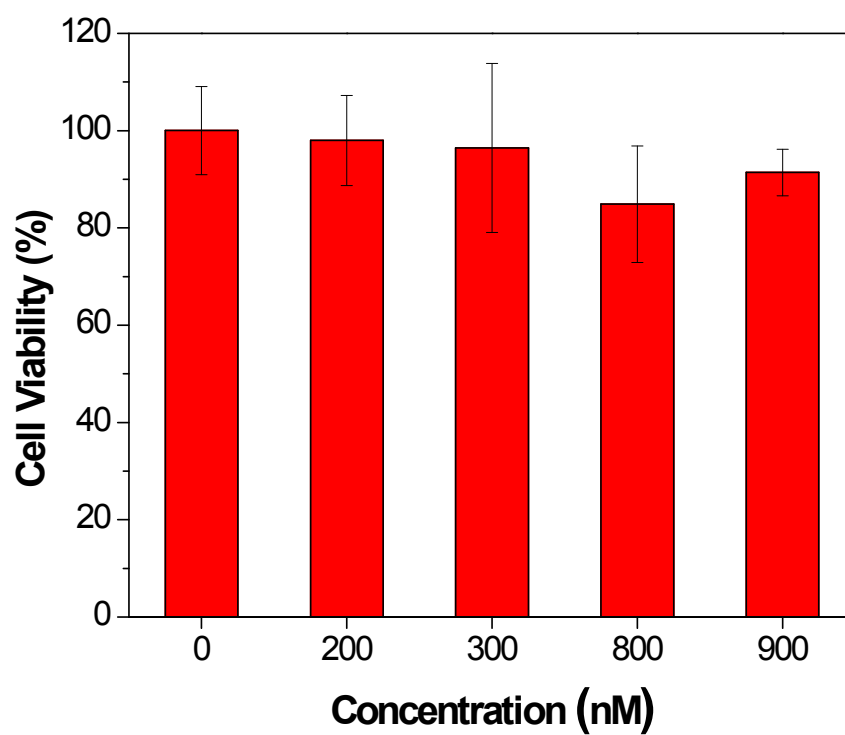

Figure S11 Viability of HeLa cells in the presence of different concentrations of (*E*)-TPEDEPy-DBz for 24 h. Data are expressed as mean value of six separate trials.
